# Supplementary material for: Astrocytes Amplify Neuronal Dendritic Volume Transmission Stimulated by Norepinephrine
Source: PubMed Central journal article supplement — Cell Rep. Author manuscript; Available in PMC 2020 Feb 10. (PMC7010232; doi:10.1016/j.celrep.2019.11.092), 2019-12-24
Supplement: NIHMS1547523-supplement-1.pdf [file NIHMS1547523-supplement-1.pdf]

**Cell Reports, Volume 29**

**Supplemental Information**

**Astrocytes Amplify Neuronal Dendritic Volume**

**Transmission Stimulated by Norepinephrine**

**Chun Chen, ZhiYing Jiang, Xin Fu, Diankun Yu, Hai Huang, and Jeffrey G. Tasker**

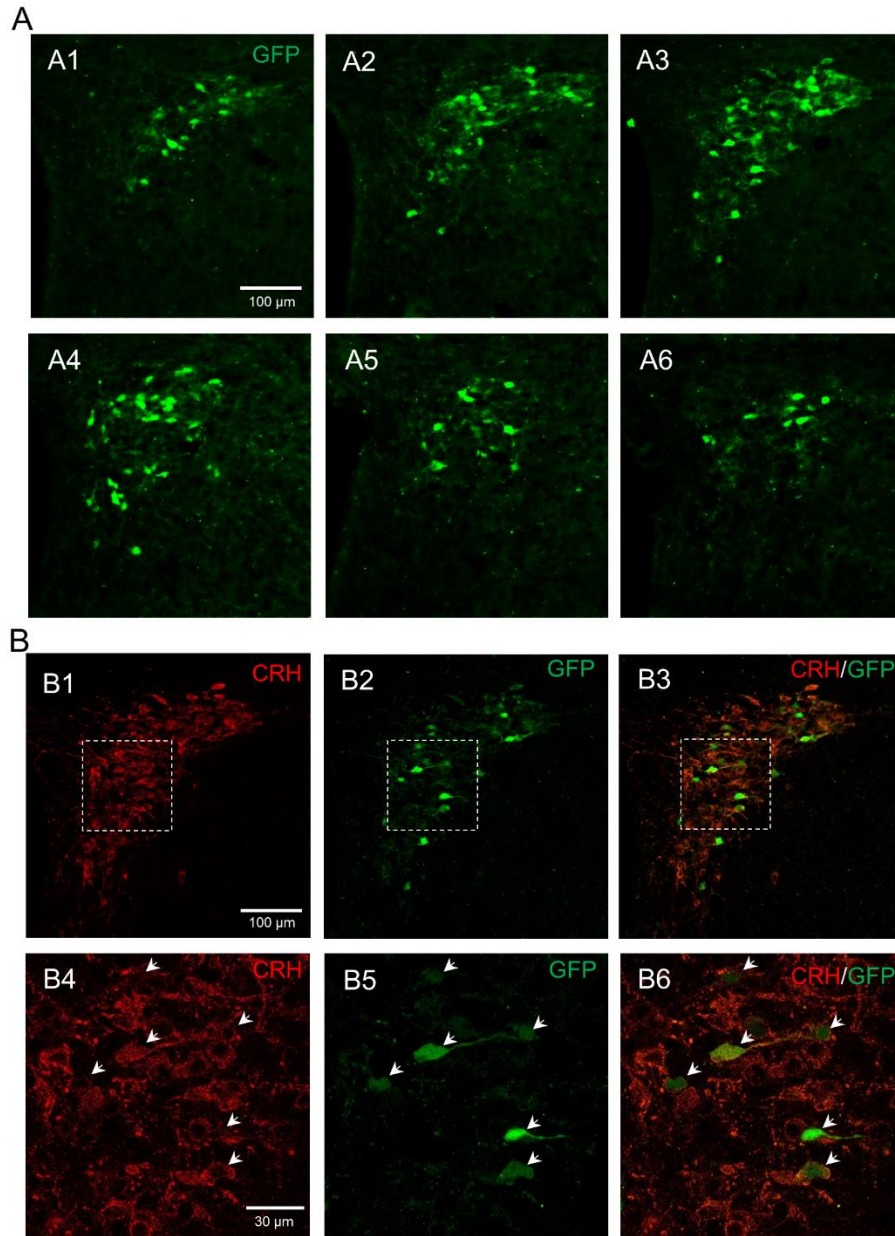

**Figure S1. eGFP expression in CRH neurons in the CRH-eGFP mouse, Related to STAR Methods.**

**(A)** Serial rostral-to-caudal (**A1-6**) expression of eGFP in sections of the PVN of a CRH-eGFP mouse.

**(B)** CRH immunofluorescence in a section from a CRH-eGFP mouse showing CRH immunolabeled neurons in the PVN (red, **B1**), CRH-eGFP-expressing neurons in the same section (green, **B2**), and the overlay of the two (**B3**).

Lower panels (**B4-6**) are boxed region of the upper panels at higher magnification.

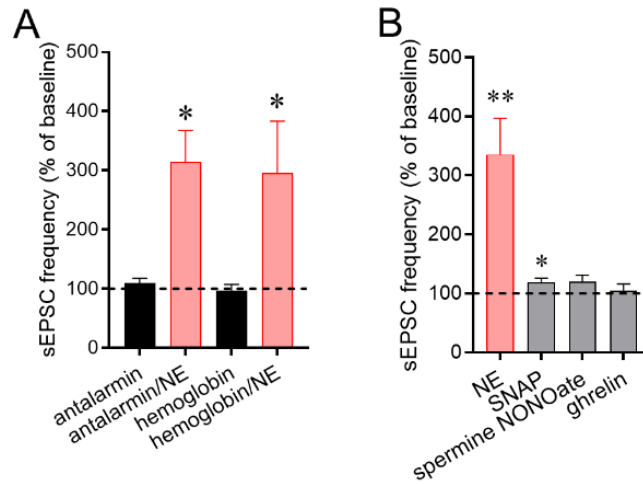

**Figure S2. The retrograde messenger activated by norepinephrine is not CRH or NO,** Related to Figure 4.

**(A)** The CRHR1 receptor antagonist, antalarmin, and a scavenger of extracellular NO, hemoglobin, had no effect on the NE-induced increase in sEPSC frequency (n = 5 and 6 cells, respectively).

**(B)** The NO donors (SNAP, spermine NONOate) failed to mimic the NE effect on sEPSC frequency (n = 8 and 5 cells, respectively), although SNAP caused a small increase in sEPSC frequency. Ghrelin had no effect on the sEPSC frequency (n = 10 cells). \* p < 0.05; \*\* p < 0.01.

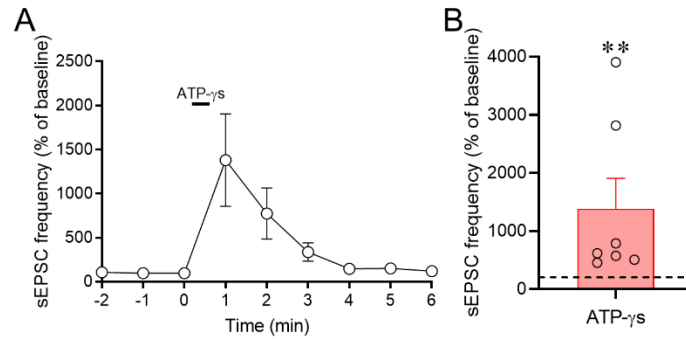

**Figure S3. ATP mimicked the NE-induced facilitation of sEPSC frequency independent of activation of astrocytes,** Related to Figure 4.

**(A)** Time plot of the increase in sEPSC frequency induced by the non-hydrolyzable ATP analog ATP- $\gamma$ s after a 2-h preincubation in ACSF containing FCA. The ATP- $\gamma$ s was puff applied focally for 30 sn (n = 7 cells).

**(B)** Scatter plot/bar graph of the mean ATP- $\gamma$ s-induced facilitation of sEPSC frequency (n = 7 cells). \*\* p<0.01.

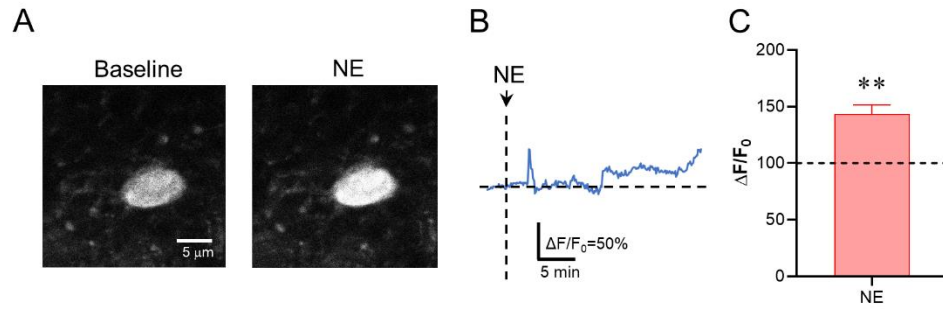

**Figure S4. Norepinephrine-induced calcium response in astrocytes measured using two-photon microscopy,**

Related to Figure 4.

(A) Two-photon fluorescence images showing the glial calcium response to norepinephrine in an astrocyte in the PVN loaded with the glia-specific calcium indicator Rhod-2/AM.

(B) The normalized fluorescence intensity of the response to norepinephrine (NE) of the cell shown in A.

(C) Mean normalized fluorescence intensity of the norepinephrine response in PVN astrocytes (n = 5 cells). Bath application of norepinephrine induced a significant increase in astrocytic calcium. \*\* p < 0.05.

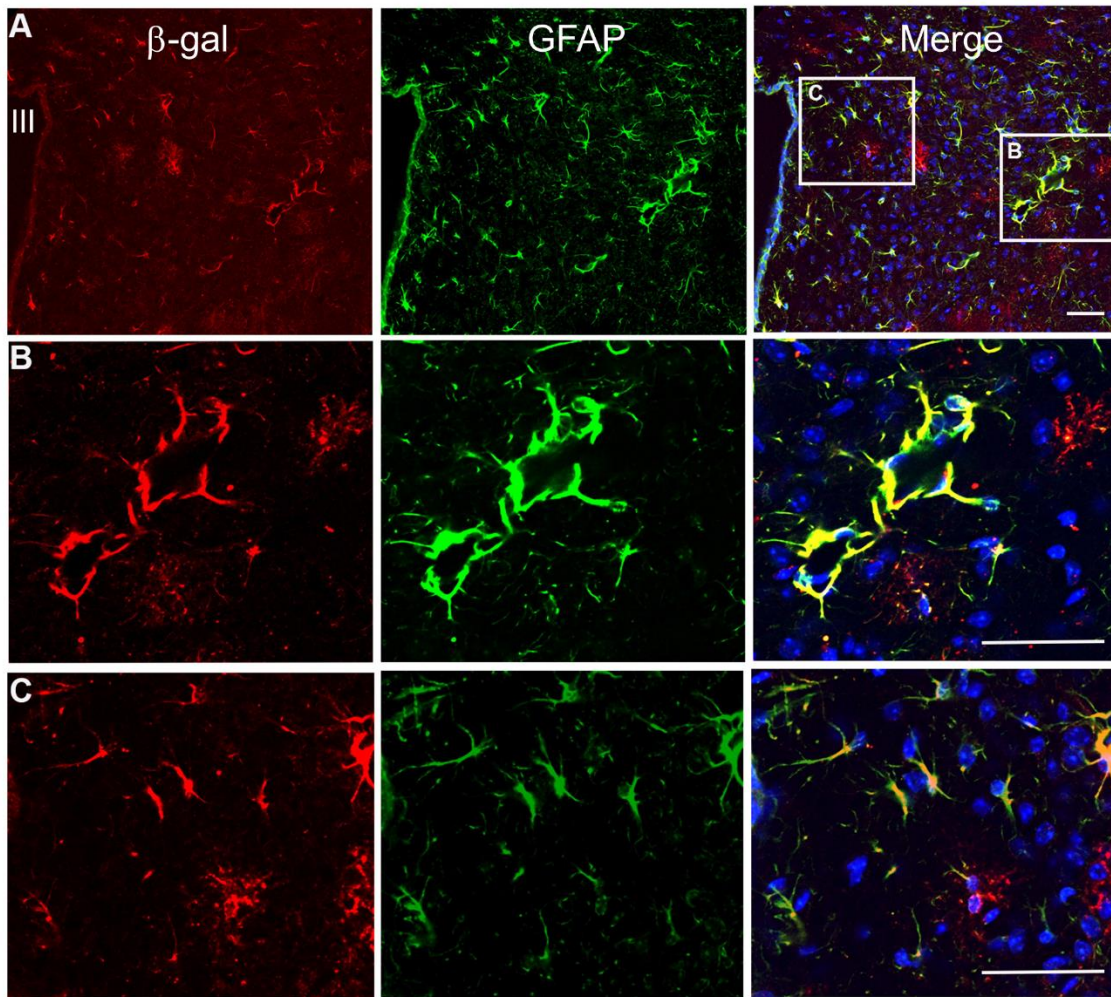

**Figure S5. Immunohistochemical confirmation of dn-SNARE expression in PVN astrocytes**, Related to Figure 4. Immunohistochemical labeling of  $\beta$ -galactosidase ( $\beta$ -Gal, red, left column) and glial fibrillary acidic protein (GFAP, green, middle column) in the PVN, and merge of the two with additional blue DAPI nuclear staining (Merge, right column). The dn-SNARE transgene co-expresses  $\beta$ -Gal, allowing the  $\beta$ -Gal immunolabeling to be used as a marker for dn-SNARE expression. GFAP immunostaining was used as an astrocytic marker.

(A) Low-magnification showing the whole PVN.

(B) High magnification of the region in A outlined by box B.

(C) High magnification of the region in A outlined by box C.

Scale bar = 50  $\mu$ m in A-C.
